# Supplementary material for: Microbial-Based Double-Stranded RNA Production to Develop Cost-Effective RNA Interference Application for Insect Pest Management
Source: PubMed Central journal article supplement — Int J Insect Sci. 2019 Apr 24;11:1179543319840323. doi: 10.1177/1179543319840323 (PMC6482651; doi:10.1177/1179543319840323), 2019-04-24
Supplement: Figure_S1_R2_xyz1607784970975_(4).pdf [file Figure_S1_R2_xyz1607784970975_%284%29.pdf]

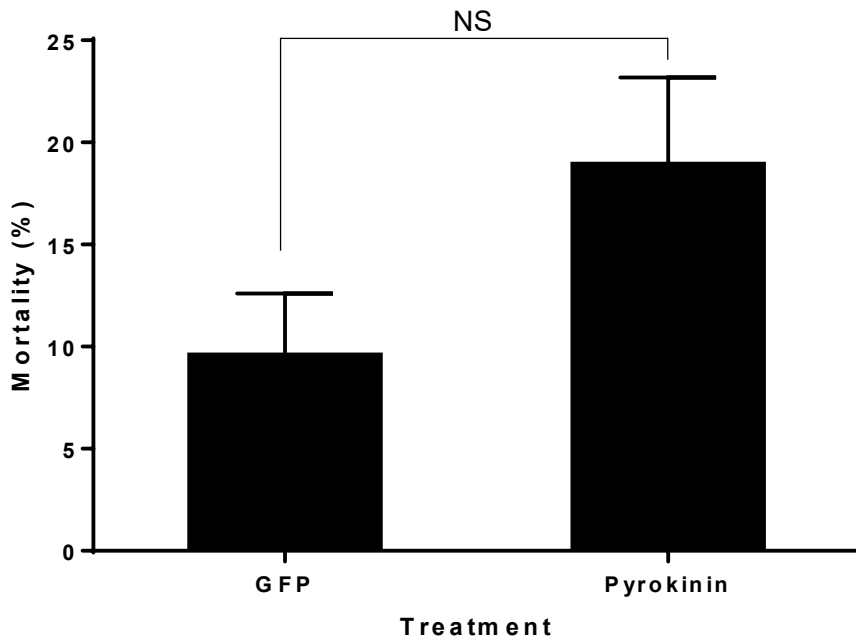

**Figure S1.** Fly mortality of *D. sukukii* after pyrokinin dsRNA injection (mean + s.e.m). Five-day old flies were injected with pyrokinin dsRNA (1  $\mu$ g/50 nL/fly) or GFP dsRNA control (1  $\mu$ g/50 nL/fly) and observed for 3 days. NS indicates no significantly different between pyrokinin dsRNA treatment and GFP dsRNA control at 95% confidence level (Mann Whitney test, two-tailed,  $P = 0.0543$ ,  $n \geq 100$ ). Experiment was repeated five times at least.
